# Supplementary material
Source: PubMed Central journal article supplement (PMC3297091)
Supplement: supp_185.2.179_Noah_ODS_figs_1-12.pdf [file supp_185.2.179_Noah_ODS_figs_1-12.pdf]

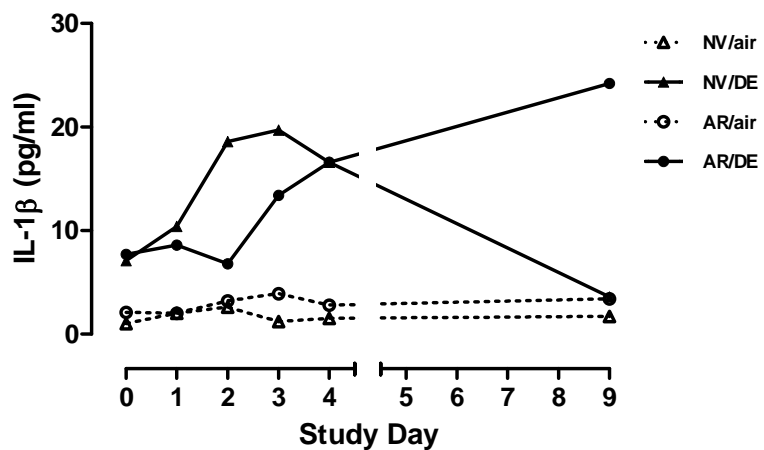

Fig. E1. Time course of IL-1 $\beta$  in nasal lavage fluids.

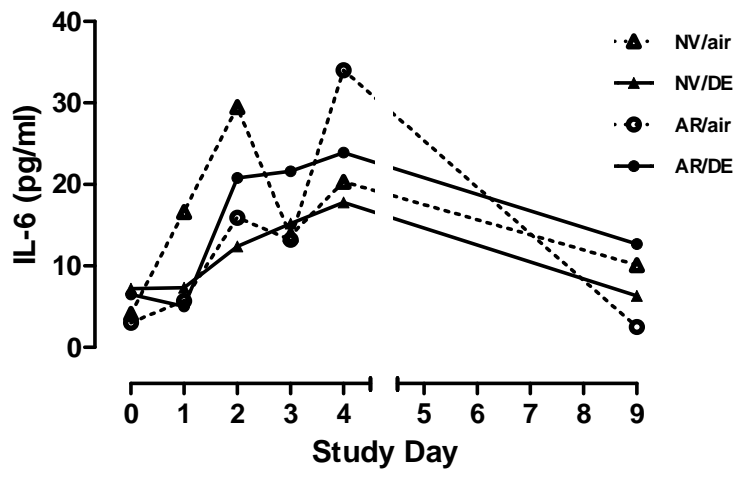

Fig. E2. Time course of IL-6 in nasal lavage fluids.

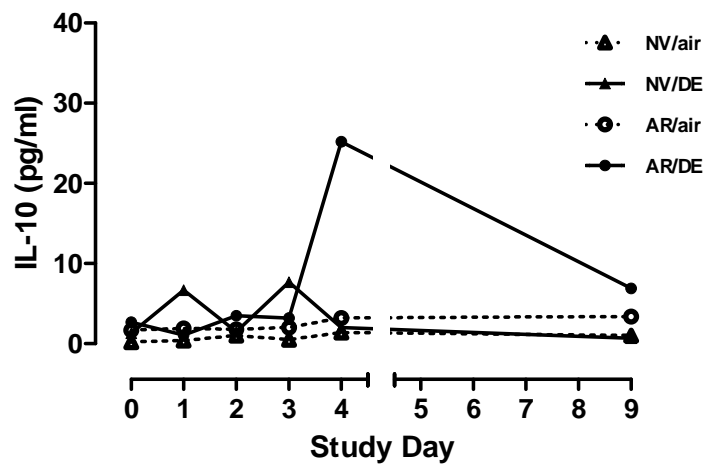

Fig. E3. Time course of IL-10 in nasal lavage fluids.

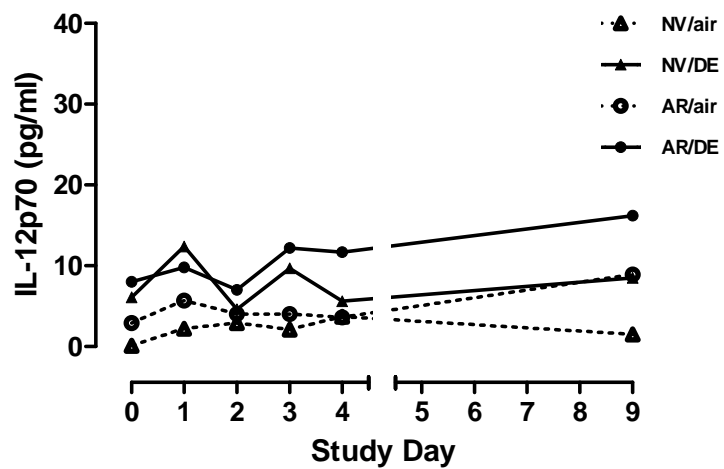

Fig. E4. Time course of IL-12p70 in nasal lavage fluids.

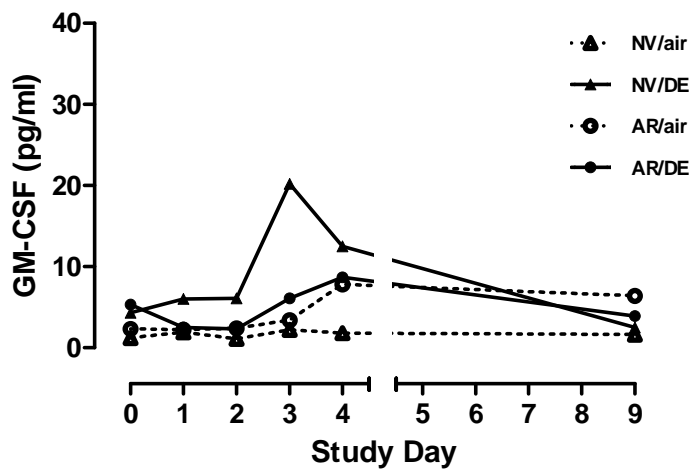

Fig. E5. Time course of GM-CSF in nasal lavage fluids.

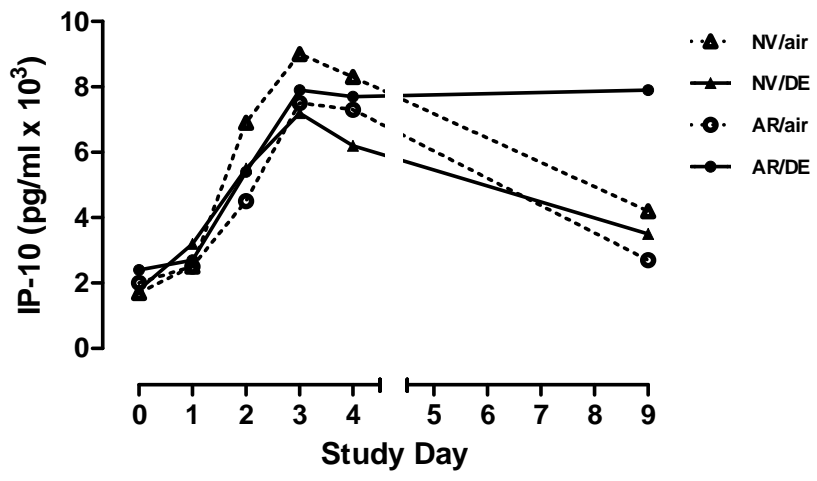

Fig. E6. Time course of IP-10 in nasal lavage fluids.

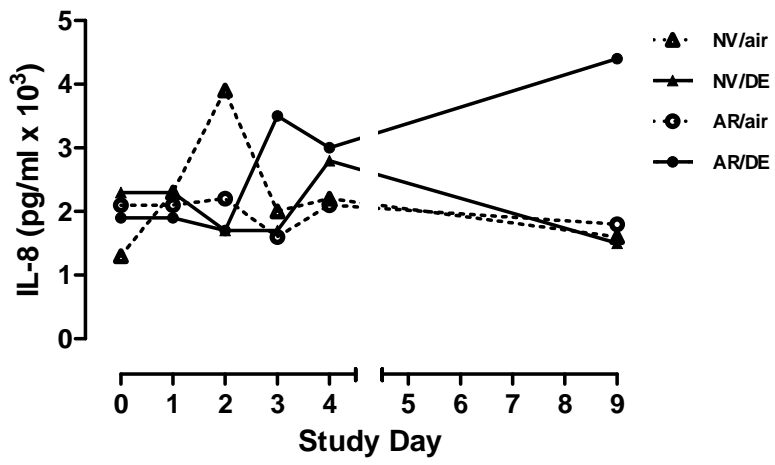

Fig. E7. Time course of IL-8 in nasal lavage fluids.

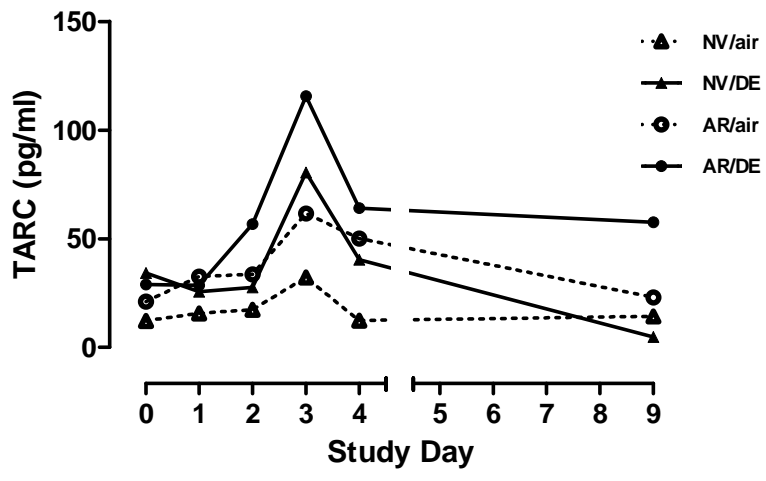

Fig. E8. Time course of TARC in nasal lavage fluids.



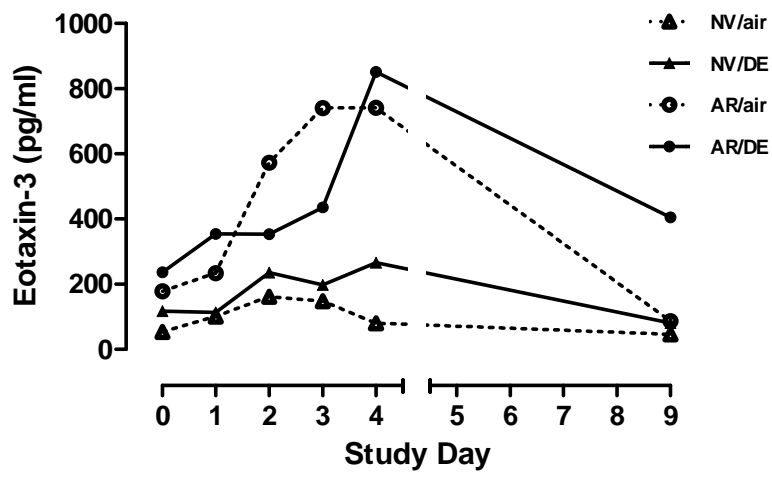

Fig. E9. Time course of Eotaxin-3 in nasal lavage fluids.

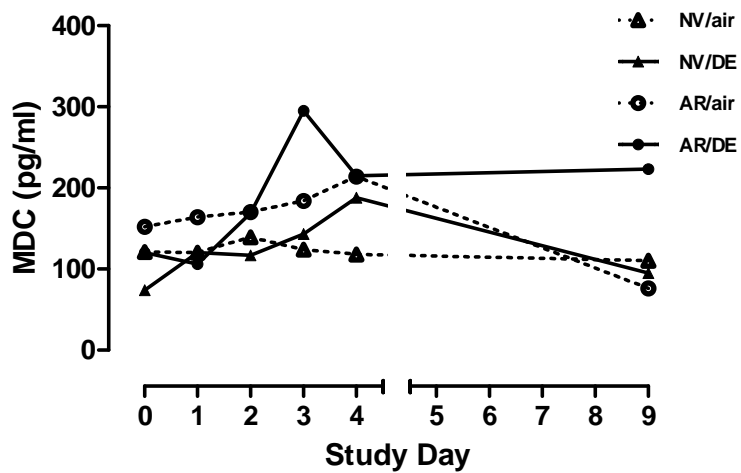

Fig. E10. Time course of MDC in nasal lavage fluids.

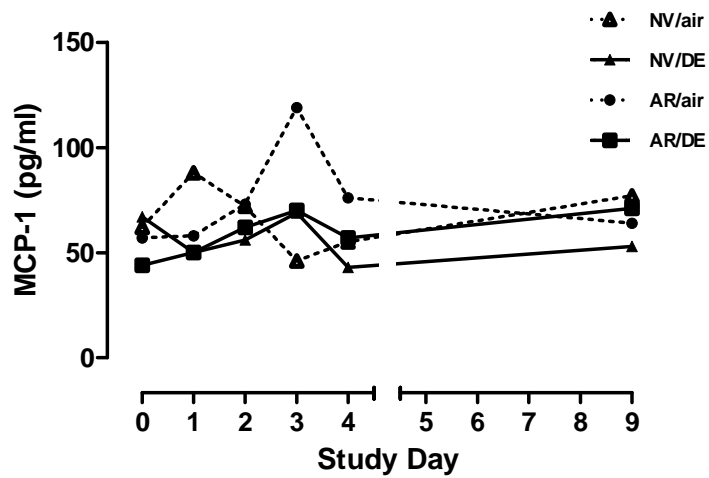

Fig. E11. Time course of MCP-1 in nasal lavage fluids.

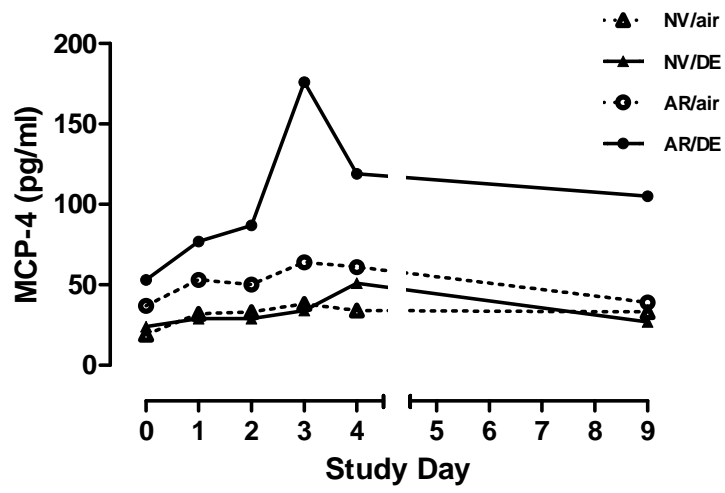

Fig. E12. Time course of MCP-4 in nasal lavage fluids.
